# Supplementary material for: Prostate cancer health and cultural beliefs of black men: The Florida Prostate Cancer Disparity Project
Source: Springer Nature journal article supplement (doi:10.1186/1750-9378-6-s2-s10), 2011-09-23
Supplement: 13027_2011_293_MOESM1_ESM.pdf [file 13027_2011_293_MOESM1_ESM.pdf]

**Table 1**  
**Participants' Demographics**

| <b>Variable</b>                      | <b>Frequency</b> | <b>Percent (%)</b> |
|--------------------------------------|------------------|--------------------|
| <b>Ethnicity</b>                     |                  |                    |
| African American of American origin  | 2066             | 79.86              |
| African American of African origin   | 145              | 5.60               |
| African American of Caribbean origin | 153              | 5.91               |
| African                              | 108              | 4.17               |
| Caribbean                            | 115              | 4.45               |
| Frequency Missing                    | 277              |                    |
| <b>Age</b>                           |                  |                    |
| 40 to 49                             | 1365             | 50.15              |
| 50 to 59                             | 971              | 35.67              |
| 60 to 69                             | 386              | 14.18              |
| Frequency Missing                    | 142              |                    |
| <b>Education</b>                     |                  |                    |
| Less than high school                | 342              | 12.84              |
| High school degree                   | 1046             | 39.28              |
| Some college training                | 540              | 20.28              |
| College degree                       | 531              | 19.94              |
| Post-college degree                  | 204              | 7.66               |
| Frequency Missing                    | 201              | 12.84              |
| <b>Marital Status</b>                |                  |                    |
| Single                               | 1057             | 38.53              |

---

|                       |      |       |
|-----------------------|------|-------|
| Married               | 1279 | 46.63 |
| Divorced              | 333  | 12.14 |
| Widowed               | 74   | 2.70  |
| Frequency Missing     | 121  |       |
| Employment            |      |       |
| Full time             | 1333 | 48.83 |
| Part time             | 312  | 11.43 |
| Disability            | 252  | 9.23  |
| Retired               | 251  | 9.19  |
| Unemployed            | 582  | 21.32 |
| Frequency Missing     | 134  |       |
| Household Income (\$) |      |       |
| 0-19,999              | 1052 | 39.30 |
| 20,000-39,999         | 659  | 24.62 |
| 40,000-59,999         | 360  | 13.45 |
| 60,000-79,999         | 24   | 9.15  |
| 80,000 – 99,999       | 5    | 5.90  |
| 100,000 and above     | 158  | 7.58  |
| Frequency Missing     | 203  |       |
| Insurance             |      |       |
| Yes                   | 1710 | 63.81 |
| No                    | 970  | 36.19 |
| Frequency Missing     | 184  |       |

---
