# Supplementary material for: Prostate cancer health and cultural beliefs of black men: The Florida Prostate Cancer Disparity Project
Source: Springer Nature journal article supplement (doi:10.1186/1750-9378-6-s2-s10), 2011-09-23
Supplement: 13027_2011_293_MOESM2_ESM.pdf [file 13027_2011_293_MOESM2_ESM.pdf]

**Table 2****Summary of Health Beliefs and Cultural Beliefs of Participants**

| <b>Study Variables</b>       | <b>Scale Range</b> | <b>Mean (SD)</b> | <b>Median</b> |
|------------------------------|--------------------|------------------|---------------|
| Perceived susceptibility     | 3- 15              | 9.23(2.84)       | 9             |
| Perceived severity           | 3- 15              | 10.35 (2.95)     | 11            |
| Attitude                     | 5- 25              | 19.64 (4.08)     | 20            |
| Perceived Behavioral Control | 5- 25              | 18.46 (3.98)     | 19            |
| Acculturation                | 4- 20              | 15.42 (3.16)     | 16            |
| Temporal Orientation         | 3- 15              | 7.09 (3.29)      | 6             |
| Cancer Fatalism              | 3-15               | 6.35 (3.29)      | 6             |
| Religiosity                  | 3- 15              | 12.47 (2.96)     | 13            |
