# Supplementary material for: Prostate cancer health and cultural beliefs of black men: The Florida Prostate Cancer Disparity Project
Source: Springer Nature journal article supplement (doi:10.1186/1750-9378-6-s2-s10), 2011-09-23
Supplement: 13027_2011_293_MOESM3_ESM.pdf [file 13027_2011_293_MOESM3_ESM.pdf]

**Table 3****Multiple Regression Analyses Results for Demographic Correlates**

| Variable / Item              | F-Values and Probability Values (Pr > F) for |                                    |                                    |                                   |                                |                                   |                                    |
|------------------------------|----------------------------------------------|------------------------------------|------------------------------------|-----------------------------------|--------------------------------|-----------------------------------|------------------------------------|
|                              | Ethnicity                                    | Age                                | Educati-<br>on                     | Marital<br>Status                 | Employ-<br>ment<br>status      | Income                            | Insurance                          |
| Perceived susceptibility     | <b>4.64</b><br><b>(0.0010)</b>               | <b>3.99</b><br><b>(0.0186)</b>     | 0.91<br>(0.4570)                   | 2.35<br>(0.0706)                  | 0.38<br>(0.8213)               | 0.97<br>(0.4357)                  | 2.21<br>(0.1369)                   |
| Perceived severity           | <b>3.02</b><br><b>(0.0171)</b>               | <b>3.21</b><br><b>(0.0404)</b>     | 0.60<br>(0.6621)                   | 2.21<br>(0.0854)                  | 1.46<br>(0.2109)               | <b>2.67</b><br><b>(0.0205)</b>    | 1.36<br>(0.2438)                   |
| Attitude                     | <b>3.23</b><br><b>(0.0119)</b>               | <b>16.03</b><br><b>(&lt;.0001)</b> | <b>10.64</b><br><b>(&lt;.0001)</b> | 1.84<br>(0.1382)                  | 1.73<br>(0.1413)               | <b>6.71</b><br><b>(&lt;.0001)</b> | <b>5.60</b><br><b>(0.0180)</b>     |
| Outcome Beliefs              | <b>7.46</b><br><b>(&lt;.0001)</b>            | 2.31<br>(0.0992)                   | <b>9.88</b><br><b>(&lt;.0001)</b>  | <b>2.91</b><br><b>(0.0332)</b>    | 2.23<br>(0.0630)               | <b>3.62</b><br><b>(0.0029)</b>    | <b>8.94</b><br><b>(0.0028)</b>     |
| Perceived behavioral control | 0.81<br>(0.5206)                             | <b>12.46</b><br><b>(&lt;.0001)</b> | <b>7.83</b><br><b>(&lt;.0001)</b>  | 1.88<br>(0.1317)                  | 1.77<br>(0.1324)               | <b>2.31</b><br><b>(0.0421)</b>    | <b>10.34</b><br><b>(0.0013)</b>    |
| Acculturation                | 0.77<br>(0.5455)                             | 0.94<br>(0.3908)                   | 1.51<br>(0.1965)                   | 0.74<br>(0.5255)                  | 0.37<br>(0.8316)               | <b>4.30</b><br><b>(0.0007)</b>    | <b>8.86</b><br><b>(0.0029)</b>     |
| Temporal orientation         | <b>6.02</b><br><b>(&lt;.0001)</b>            | 1.23<br>(0.2935)                   | <b>13.04</b><br><b>(&lt;.0001)</b> | <b>7.19</b><br><b>(&lt;.0001)</b> | <b>2.60</b><br><b>(0.0342)</b> | <b>5.93</b><br><b>(&lt;.0001)</b> | <b>14.92</b><br><b>(0.0001)</b>    |
| Cancer fatalism              | <b>8.69</b><br><b>(&lt;.0001)</b>            | 0.34<br>(0.7129)                   | <b>9.26</b><br><b>(&lt;.0001)</b>  | <b>5.13</b><br><b>(0.0016)</b>    | <b>3.18</b><br><b>(0.0130)</b> | <b>4.39</b><br><b>(0.0006)</b>    | <b>9.68</b><br><b>(0.0019)</b>     |
| Religiosity                  | <b>5.66</b><br><b>(0.0002)</b>               | 0.70<br>(0.4988)                   | <b>3.12</b><br><b>(0.0143)</b>     | 1.88<br>(0.1303)                  | 1.24<br>(0.2920)               | <b>2.47</b><br><b>(0.0308)</b>    | <b>29.67</b><br><b>(&lt;.0001)</b> |

† Results in bold-font are statistically significant at p<0.05 level.
